# Supplementary material for: A systematic review and meta-analysis of patient data from the West Africa (2013–16) Ebola virus disease epidemic
Source: PubMed Central journal article supplement — Clin Microbiol Infect. Author manuscript; Available in PMC 2020 Dec 11. (PMC7116468; doi:10.1016/j.cmi.2019.06.032), 2019-07-05
Supplement: EMS104662-supplement-Supplementary_materials.pdf [file EMS104662-supplement-Supplementary_materials.pdf]

A systematic review and meta-analysis of patient  
data from the West Africa (2013-16) Ebola Virus  
Disease epidemic. Supplementary Materials

Rojek *et al*

June 25, 2019

# 1 Appendix 1

|              | PubMed ID                 | Author                        | n    | Data from >1 ETU? | Type                            | Name of ETU                                                | Medical care provider | Date of first patient inclusion | Date of last patient inclusion | Date published | Is the article reporting duplicate data or overlapping data? (If yes, ranking in brackets)      |
|--------------|---------------------------|-------------------------------|------|-------------------|---------------------------------|------------------------------------------------------------|-----------------------|---------------------------------|--------------------------------|----------------|-------------------------------------------------------------------------------------------------|
| Guinea       | 26625118                  | Faye <i>et al.</i>            | 699  | Yes               | Ret                             | Hospitals in Conakry area, undefined                       | Not applicable        | 01/03/2014                      | 28/02/2015                     | 01/12/2015     | (1/4) Donka Hospital,<br>(1/3) French Military Hospital,<br>(1/3) Conakry Healthcare Worker ETU |
|              | 26134358                  | Bordes <i>et al.</i>          | 22   | No                | Pro                             | Conakry French Military ETU                                | French Military       | xx/01/2015                      | xx/04/2015                     | 02/07/2015     | Yes (2/3)                                                                                       |
|              | 26338789                  | Cournac <i>et al.</i>         | 22   | No                | Pro                             | Conakry French Military ETU                                | French Military       | xx/01/2015                      | xx/04/2015                     | 03/09/2015     | Yes (3/3)                                                                                       |
|              | 26541219                  | Cotte <i>et al.</i>           | 14   | No                | Pro                             | Conakry Healthcare Workers ETU                             | French Military       | xx/01/2015                      | xx/03/2015                     | 02/11/2015     | Yes (2/3)                                                                                       |
|              | 26582958                  | Janvier <i>et al.</i>         | 14   | No                | Ret                             | Conakry Healthcare Workers ETU                             | Unknown               | unknown                         | unknown                        | 17/11/2015     | Yes(3/3)                                                                                        |
|              | 25391486                  | Barry <i>et al.</i>           | 90   | No                | Pro                             | Donka National Hospital*                                   | DDITD & MSF           | 25/03/2014                      | 20/08/2014                     | 23/10/2014     | Yes (2/5)                                                                                       |
|              | 25770172                  | Barry <i>et al.</i>           | 89   | No                | Pro                             | Donka National Hospital                                    | DDITD & MSF           | xx/03/2014                      | xx/08/2014                     | 13/03/2015     | Yes (3/5)                                                                                       |
|              | 25992182                  | Qureshi <i>et al.</i>         | 70   | No                | Ret                             | Donka National Hospital                                    | DDITD & MSF           | 25/03/2014                      | 05/08/2014                     | xx/02/2015     | Yes (4/5)                                                                                       |
|              | 25372658                  | Bah <i>et al.</i>             | 37   | Yes               | Ret                             | Donka National Hospital & Hopital de l'Amite Sino-Guineene | MSF                   | 25/03/2014                      | 26/04/2014                     | 05/11/2014     | Yes (5/5)                                                                                       |
|              | 27638946                  | Kerber <i>et al.</i>          | 1231 | Yes               | Ret                             | Hospitals in Gueckedo, undefined                           | Multiple              | 30/03/2014                      | 30/03/2015                     | 16/09/2016     | No                                                                                              |
| 28352651     | Vernet <i>et al.</i>      | 97                            | Yes  | Pro               | Macenta and Nzerekore ETU       | IFRC France, ALIMA                                         | 29/11/2014            | 31/01/2015                      | 23/03/2017                     | Yes (1/2)      |                                                                                                 |
| 27928085     | Loubet <i>et al.</i>      | 76                            | No   | Ret               | Nzerekore ETU                   | ALIMA                                                      | 02/12/2014            | 23/02/2015                      | 10/10/2016                     | Yes (2/2)      |                                                                                                 |
| Sierra Leone | 27806732                  | Ji <i>et al.</i>              | 285  | No                | Ret                             | Freetown China-SL Friendship Hospital* ^                   | Chinese Medical Team  | 01/10/2014                      | 21/03/2015                     | 03/11/2016     | Yes (1/6)                                                                                       |
|              | 26523640                  | Li <i>et al.</i>              | 288  | No                | Ret                             | Freetown China-SL Friendship Hospital                      | Chinese Medical Team  | 01/10/2014                      | 20/03/2015                     | 30/10/2015     | Yes (2/6)                                                                                       |
|              | 27317404                  | Xu <i>et al.</i>              | 139  | No                | Ret                             | Freetown China-SL Friendship Hospital                      | Chinese Medical Team  | 15/11/2014                      | 18/01/2015                     | 14/06/2016     | Yes (3/6)                                                                                       |
|              | 26223324                  | Yan <i>et al.</i>             | 85   | No                | Ret                             | Freetown China-SL Friendship Hospital                      | Chinese Medical Team  | 01/10/2014                      | 09/11/2014                     | 30/07/2015     | Yes (4/6)                                                                                       |
|              | 26398207                  | Zhang <i>et al.</i>           | 63   | No                | Mix                             | Freetown China-SL Friendship Hospital                      | Chinese Medical Team  | 01/10/2014                      | 18/01/2015                     | 23/09/2015     | Yes (5/6)                                                                                       |
|              | 25995207                  | Qin <i>et al.</i>             | 61   | No                | Ret                             | Freetown China-SL Friendship Hospital                      | Chinese Medical Team  | 01/10/2014                      | 14/11/2014                     | 20/05/2015     | Yes (6/6)                                                                                       |
|              | 26551684                  | Lanini <i>et al.</i>          | 84   | No                | Ret                             | Emergency NGO ETU, Freetown                                | Emergency             | 13/12/2014                      | 20/04/2015                     | 09/11/2015     | No                                                                                              |
|              | 28151955                  | Hartley <i>et al.</i>         | 158  | No                | Ret                             | GOAL-Mathaska ETU                                          | GOAL Global           | 14/12/2014                      | 15/11/2015                     | 02/02/2017     | No                                                                                              |
|              | 28258817                  | Waxman <i>et al.</i>          | 254  | Yes               | Ret                             | Lunsar, Makeni, Kambia ETU                                 | IMC                   | 01/12/2014                      | 15/10/2015                     | 28/02/2017     | No                                                                                              |
|              | 27268303                  | Haaskjold <i>et al.</i>       | 31   | No                | Ret                             | Moyamba ETU                                                | Medicos del Mundo     | 19/12/2014                      | 17/02/2015                     | 15/09/2016     | Yes (1/2)                                                                                       |
|              | 27334891                  | Arranz <i>et al.</i>          | 31   | No                | Ret                             | Moyamba ETU                                                | Medicos del Mundo     | xx/12/2014                      | xx/03/2015                     | 22/06/2016     | Yes (2/2)                                                                                       |
|              | 26812579                  | Crowe <i>et al.</i>           | 151  | Yes               | Ret                             | Bo District ETU*                                           | MSF                   | 12/09/2014                      | 07/01/2015                     | xx/02/2016     | Yes (1/2)                                                                                       |
|              | 26551677                  | de La Vega <i>et al.</i>      | 632  | No                | Ret                             | Kailahun ETU                                               | MSF                   | 01/07/2014                      | 30/11/2014                     | 09/11/2015     | Yes (1/4)                                                                                       |
|              | 26002981                  | Fitzpatrick <i>et al.</i>     | 525  | No                | Ret                             | Kailahun ETU                                               | MSF                   | 26/06/2014                      | 12/10/2014                     | 22/05/2015     | Yes (2/4)                                                                                       |
|              | 25565430                  | Dallatomasina <i>et al.</i>   | 489  | No                | Ret                             | Kailahun ETU                                               | MSF                   | 23/06/2014                      | 05/10/2014                     | 02/03/2015     | Yes (3/4)                                                                                       |
|              | 28459838                  | Theocharopoulos <i>et al.</i> | 249  | Yes               | Ret                             | Kailahun (n=210), Magburaka (n=118), and Bo (n=44)         | MSF                   | 12/09/2014                      | 21/03/2015                     | 01/05/2017     | (4/4) Kailahun,<br>(2/2) Bo                                                                     |
|              | 26271406                  | Hunt <i>et al.</i>            | 118  | No                | Pro                             | Kerry Town                                                 | Save the Children     | 08/12/2014                      | 09/01/2015                     | 11/08/2015     | No                                                                                              |
| 25353969     | Schieffelin <i>et al.</i> | 87                            | No   | Ret               | Kenema Government Hospital      | SL government                                              | 25/05/2014            | 18/06/2014                      | 29/10/2014                     | No             |                                                                                                 |
| 25539447     | Ansumana <i>et al.</i>    | 581                           | No   | Ret               | Hastings Police Training School | Unknown                                                    | 20/09/2014            | 07/12/2014                      | 24/12/2014                     | No             |                                                                                                 |
| Liberia      | 25845607                  | Levine <i>et al.</i>          | 160  | No                | Ret                             | Bong County ETU                                            | IMC                   | 15/09/2014                      | 04/01/2015                     | 03/04/2015     | No                                                                                              |
|              | 26735991                  | Gignoux <i>et al.</i>         | 381  | No                | Ret                             | Foya ETU                                                   | MSF                   | 05/06/2014                      | 24/10/2014                     | 07/01/2016     | No                                                                                              |
|              | 27531847                  | Rosenke <i>et al.</i>         | 1182 | No                | Ret                             | Eternal Love Winning Africa 3                              | MSF                   | xx/08/2014                      | xx/02/2015                     | 15/08/2016     | No                                                                                              |
| All          | 25539446                  | WHO <i>et al.</i>             | 5564 | Yes               | Ret                             | not applicable                                             | not applicable        | 30/12/2013                      | 24/11/2014                     | 24/12/2014     | Comparison data only                                                                            |

Figure 1: Abbreviations used: Ret is retrospective; Pro is prospective; Mix is mixed prospective and retrospective enrolment; SL is Sierra Leone; DDITD is Donka Department of Infectious and Tropical Diseases; xx is date unknown. \* is status changed from holding unit to ETC; ^ is for ETC known by various names. The location of facilities is shown in appendix 8

## 2 Appendix 2

5

| Study details |                        |                               | Markers of data quality                                                                                   |                                                                     |                                                                                |                                                                                                                                                                     |                                                               |                                                                      | Markers of clinical utility   |                                                           |                                 |                                                       |
|---------------|------------------------|-------------------------------|-----------------------------------------------------------------------------------------------------------|---------------------------------------------------------------------|--------------------------------------------------------------------------------|---------------------------------------------------------------------------------------------------------------------------------------------------------------------|---------------------------------------------------------------|----------------------------------------------------------------------|-------------------------------|-----------------------------------------------------------|---------------------------------|-------------------------------------------------------|
|               | PubMed ID              | Author                        | Source of clinical data is defined<br>S = source document defined<br>T = time of data collection provided | Temporal indicators for data<br>D = exact days<br>M = closest month | Confirmed case is defined<br>LC = laboratory confirmed<br>A = details of assay | Inclusion and exclusion criteria clearly defined<br>D = detailed<br>C = "all confirmed"<br>CO = "confirmed and outcome known"<br>CC = "confirmed and complete data" | Records proportion of cases where clinical outcome is unknown | Statement or data^ demonstrating completeness of other clinical data | Average* of patients provided | States if any patients were pregnant<br>NS = no statement | Average* viral load/Ct provided | Average* symptom onset to admission interval provided |
| Guinea        | 26625118               | Faye <i>et al.</i>            | T & S                                                                                                     | D                                                                   | LC                                                                             | D                                                                                                                                                                   | Yes                                                           | Yes                                                                  | yes                           | NS                                                        | yes                             | yes                                                   |
|               | 26134358               | Bordes <i>et al.</i>          | T                                                                                                         | M                                                                   | No                                                                             | C                                                                                                                                                                   | Yes                                                           | No                                                                   | yes                           | NS                                                        | yes                             | no                                                    |
|               | 26338789               | Cournac <i>et al.</i>         | T                                                                                                         | M                                                                   | LC                                                                             | C                                                                                                                                                                   | Yes                                                           | No                                                                   | yes                           | NS                                                        | yes                             | yes*                                                  |
|               | 26541219               | Cotte <i>et al.</i>           | No                                                                                                        | M                                                                   | No                                                                             | C                                                                                                                                                                   | Yes                                                           | No                                                                   | yes                           | NS                                                        | no                              | yes*                                                  |
|               | 26582958               | Janvier <i>et al.</i>         | No                                                                                                        | No                                                                  | No                                                                             | C                                                                                                                                                                   | Yes                                                           | No                                                                   | yes                           | NS                                                        | yes                             | yes                                                   |
|               | 25391486               | Barry <i>et al.</i>           | No                                                                                                        | D                                                                   | LC + A                                                                         | C                                                                                                                                                                   | Yes                                                           | No                                                                   | yes                           | NS                                                        | no                              | yes                                                   |
|               | 25770172               | Barry <i>et al.</i>           | T & S                                                                                                     | M                                                                   | LC                                                                             | C                                                                                                                                                                   | Yes                                                           | No                                                                   | yes                           | NS                                                        | no                              | yes                                                   |
|               | 25992182               | Qureshi <i>et al.</i>         | T & S                                                                                                     | D                                                                   | LC                                                                             | O                                                                                                                                                                   | Yes                                                           | No                                                                   | yes                           | NS                                                        | no                              | yes                                                   |
|               | 25372658               | Bah <i>et al.</i>             | T & S                                                                                                     | D                                                                   | LC + A                                                                         | C                                                                                                                                                                   | Yes                                                           | No                                                                   | yes                           | NS                                                        | yes                             | yes                                                   |
|               | 27638946               | Kerber <i>et al.</i>          | T & S                                                                                                     | D                                                                   | LC + A                                                                         | D                                                                                                                                                                   | Yes                                                           | Yes                                                                  | yes                           | NS                                                        | yes                             | no                                                    |
|               | 28352651               | Vernet <i>et al.</i>          | S                                                                                                         | D                                                                   | LC + A                                                                         | D                                                                                                                                                                   | Yes                                                           | No                                                                   | yes                           | yes                                                       | yes                             | yes                                                   |
|               | 27928085               | Loubet <i>et al.</i>          | T & S                                                                                                     | D                                                                   | LC                                                                             | C                                                                                                                                                                   | Yes                                                           | No                                                                   | yes                           | NS                                                        | no                              | yes                                                   |
|               | Sierra Leone           | 27806732                      | Ji <i>et al.</i>                                                                                          | no                                                                  | D                                                                              | LC + A                                                                                                                                                              | C                                                             | Yes                                                                  | No                            | yes                                                       | yes                             | yes                                                   |
| 26523640      |                        | Li <i>et al.</i>              | T & S                                                                                                     | D                                                                   | LC + A                                                                         | CO                                                                                                                                                                  | Yes                                                           | Yes                                                                  | yes                           | NS                                                        | yes                             | no                                                    |
| 27317404      |                        | Xi <i>et al.</i>              | no                                                                                                        | D                                                                   | LC + A                                                                         | C                                                                                                                                                                   | Yes                                                           | No                                                                   | yes                           | NS                                                        | yes                             | yes                                                   |
| 26223324      |                        | Yan <i>et al.</i>             | T & S                                                                                                     | D                                                                   | LC + A                                                                         | CO                                                                                                                                                                  | Yes                                                           | No                                                                   | yes                           | NS                                                        | yes                             | yes                                                   |
| 26398207      |                        | Zhang <i>et al.</i>           | T & S                                                                                                     | D                                                                   | LC + A                                                                         | CO                                                                                                                                                                  | Yes                                                           | Yes                                                                  | no                            | NS                                                        | no                              | no                                                    |
| 25995207      |                        | Qin <i>et al.</i>             | no                                                                                                        | D                                                                   | No                                                                             | CO                                                                                                                                                                  | Yes                                                           | No                                                                   | yes                           | NS                                                        | no                              | yes                                                   |
| 26551684      |                        | Lanini <i>et al.</i>          | no                                                                                                        | D                                                                   | No                                                                             | D                                                                                                                                                                   | Yes                                                           | No                                                                   | yes                           | NS                                                        | yes                             | no                                                    |
| 28151955      |                        | Hartley <i>et al.</i>         | T & S                                                                                                     | D                                                                   | LC + A                                                                         | C                                                                                                                                                                   | Yes                                                           | Yes                                                                  | no                            | NS                                                        | no                              | no                                                    |
| 28258817      |                        | Waxman <i>et al.</i>          | T & S                                                                                                     | D                                                                   | LC + A                                                                         | D                                                                                                                                                                   | Yes                                                           | Yes                                                                  | yes                           | NS                                                        | no                              | no                                                    |
| 27268303      |                        | Haaskjold <i>et al.</i>       | no                                                                                                        | D                                                                   | LC + A                                                                         | C                                                                                                                                                                   | Yes                                                           | No                                                                   | yes                           | NS                                                        | yes                             | yes                                                   |
| 27334891      |                        | Arranz <i>et al.</i>          | T & S                                                                                                     | M                                                                   | LC                                                                             | C                                                                                                                                                                   | Yes                                                           | No                                                                   | yes                           | NS                                                        | no                              | yes                                                   |
| 26812579      |                        | Crowe <i>et al.</i>           | S                                                                                                         | D                                                                   | LC + A                                                                         | D                                                                                                                                                                   | Yes                                                           | Yes                                                                  | yes                           | NS                                                        | yes                             | yes                                                   |
| 26551677      |                        | de La Vega <i>et al.</i>      | no                                                                                                        | D                                                                   | LC + A                                                                         | CC                                                                                                                                                                  | Yes                                                           | Yes                                                                  | yes                           | NS                                                        | yes                             | yes                                                   |
| 26002981      |                        | Fitzpatrick <i>et al.</i>     | S                                                                                                         | D                                                                   | LC + A                                                                         | CO                                                                                                                                                                  | Yes                                                           | No                                                                   | yes                           | NS                                                        | yes                             | yes                                                   |
| 25565430      |                        | Dallatomasina <i>et al.</i>   | T & S                                                                                                     | D                                                                   | LC                                                                             | C                                                                                                                                                                   | Yes                                                           | Yes                                                                  | yes                           | NS                                                        | no                              | yes                                                   |
| 28459838      |                        | Theocharopoulos <i>et al.</i> | T & S                                                                                                     | D                                                                   | LC + A                                                                         | C                                                                                                                                                                   | Yes                                                           | No                                                                   | yes                           | NS                                                        | yes                             | yes                                                   |
| 26271406      |                        | Hunt <i>et al.</i>            | S                                                                                                         | D                                                                   | LC + A                                                                         | D                                                                                                                                                                   | Yes                                                           | No                                                                   | yes                           | NS                                                        | yes                             | yes                                                   |
| 25353969      |                        | Schieffelin <i>et al.</i>     | S                                                                                                         | D                                                                   | LC + A                                                                         | C                                                                                                                                                                   | Yes                                                           | Yes                                                                  | no                            | yes                                                       | yes                             | yes                                                   |
| 25539447      | Ansumana <i>et al.</i> | no                            | D                                                                                                         | no                                                                  | C                                                                              | no                                                                                                                                                                  | no                                                            | no                                                                   | NS                            | no                                                        | no                              |                                                       |
| Liberia       | 25845607               | Levine <i>et al.</i>          | T & S                                                                                                     | D                                                                   | LC + A                                                                         | C                                                                                                                                                                   | Yes                                                           | no                                                                   | yes                           | NS                                                        | yes                             | yes                                                   |
|               | 26735991               | Gignoux <i>et al.</i>         | T & S                                                                                                     | D                                                                   | LC + A                                                                         | CC                                                                                                                                                                  | Yes                                                           | yes                                                                  | yes                           | NS                                                        | yes                             | yes                                                   |
|               | 27531847               | Rosenke <i>et al.</i>         | No                                                                                                        | M                                                                   | LC + A                                                                         | CO                                                                                                                                                                  | Yes                                                           | Yes                                                                  | yes                           | NS                                                        | yes                             | no                                                    |

Figure 2: Quality of evidence in included articles. such as denominators for each variable.

### 3 Appendix 3

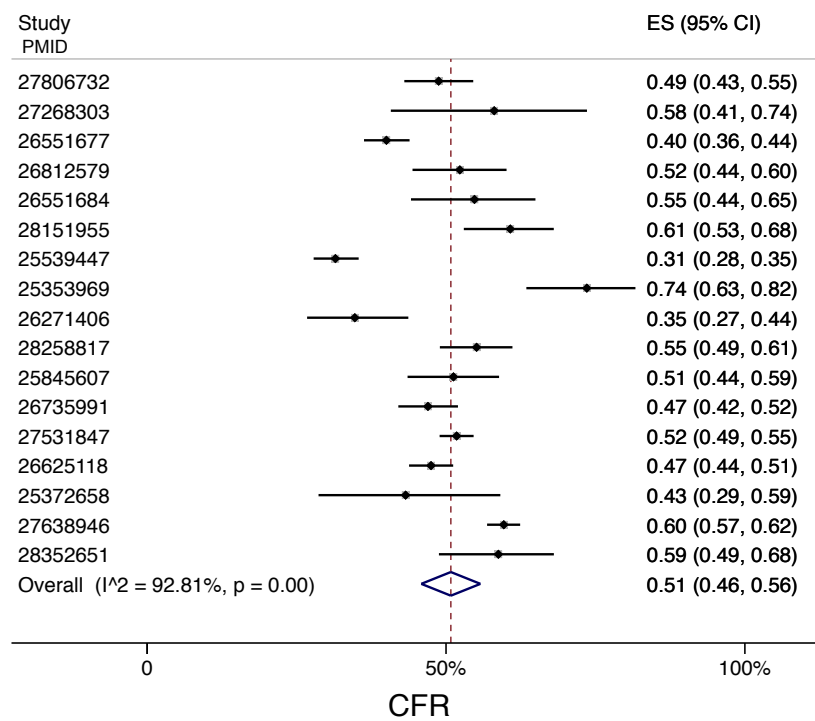

Figure 3: Meta-analysis for case fatality rate. Analysis includes the primary data-set only. ES is effect size.

## 4 Appendix 4



6

### Fever on admission

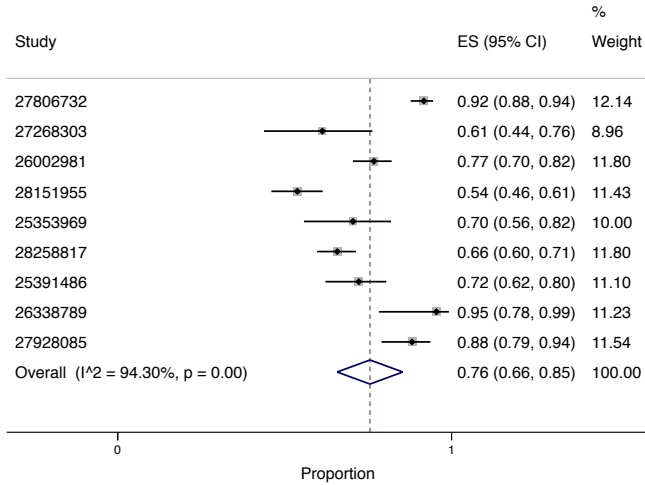

### Vomiting on admission

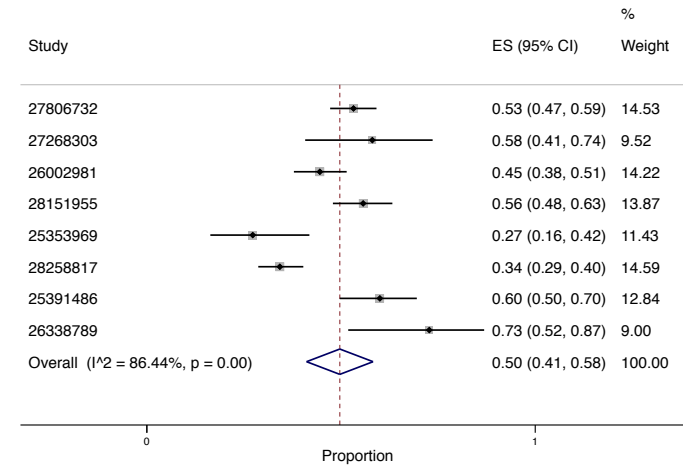

### Diarrhoea on admission

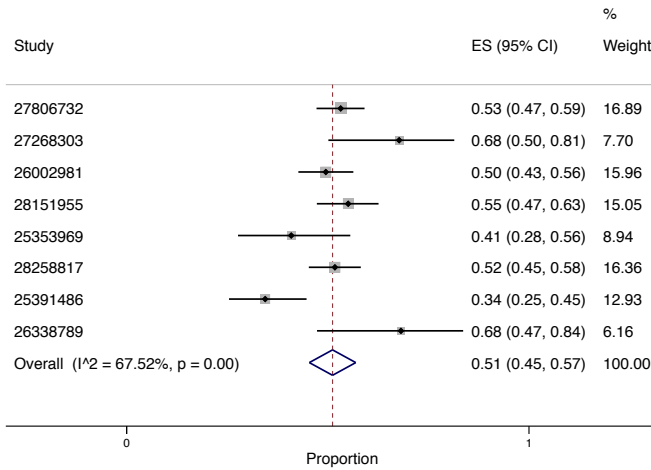

### Confused on admission

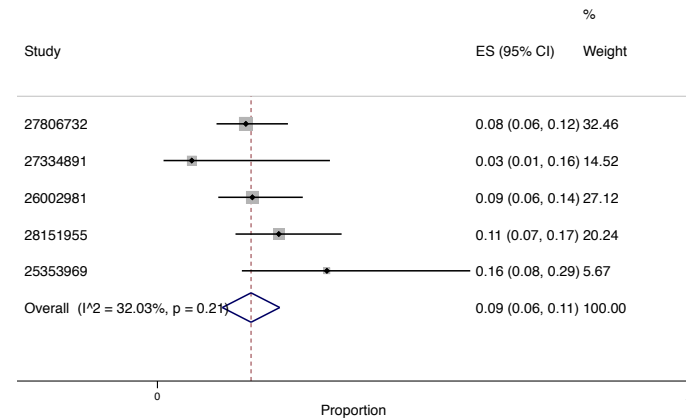

Figure 4: Proportion of EVD patients presenting with a symptom - panel A. ES refers to effect size

### Myalgia on admission

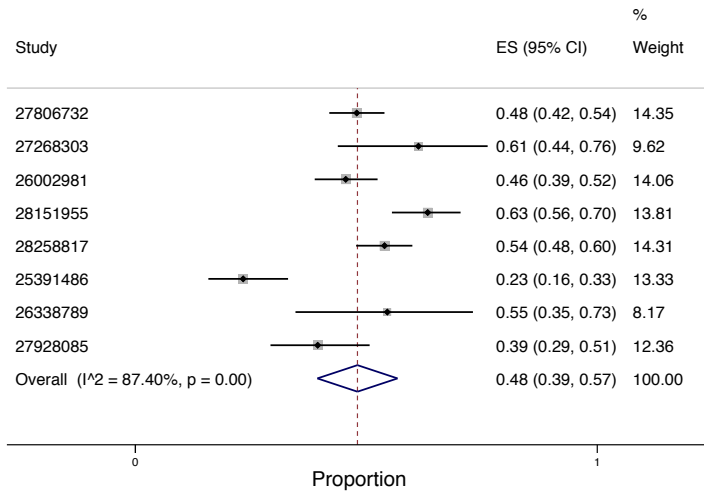

### Headache on admission

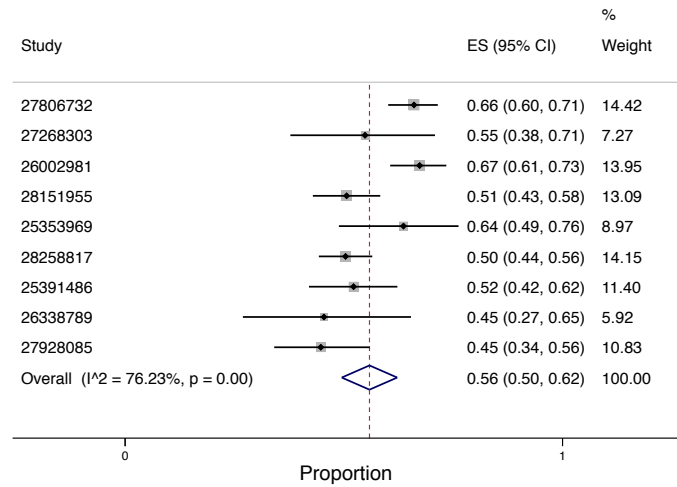

### Anorexia on admission

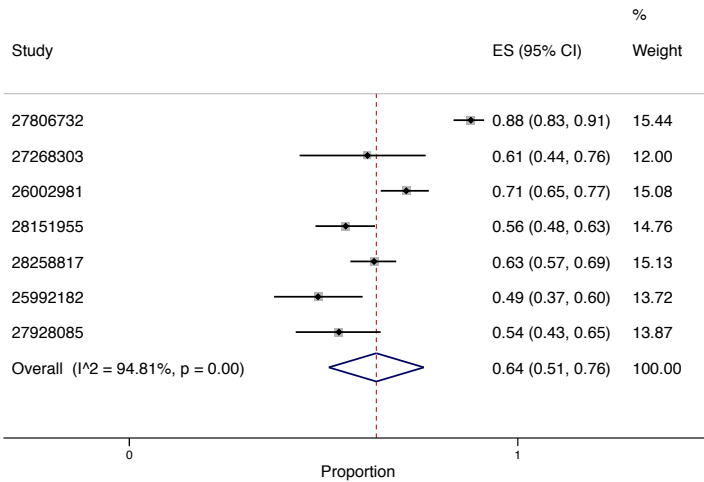

### Abdominal pain on admission

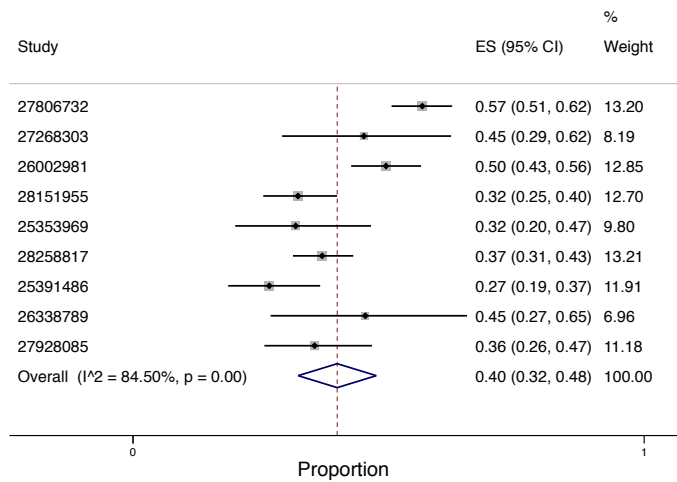

Figure 5: Proportion of EVD patients presenting with a symptom - panel B.

### Haemorrhagic symptoms on admission

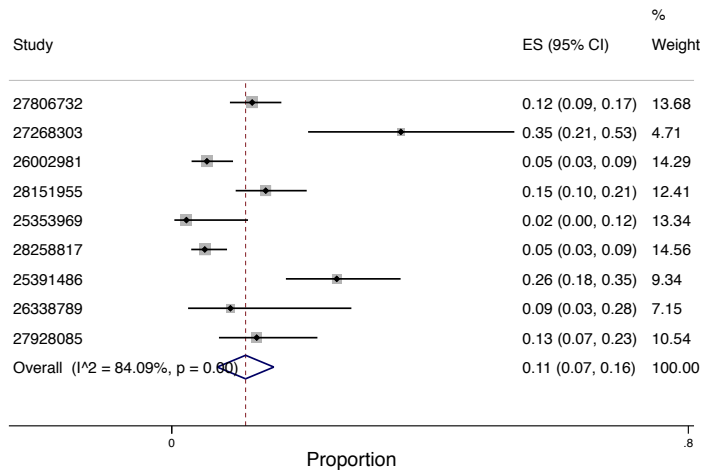

### Difficulty breathing on admission

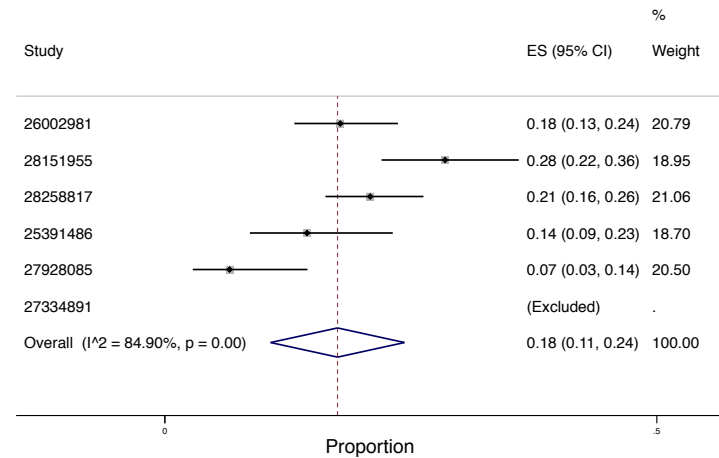

### Lethargy on admission

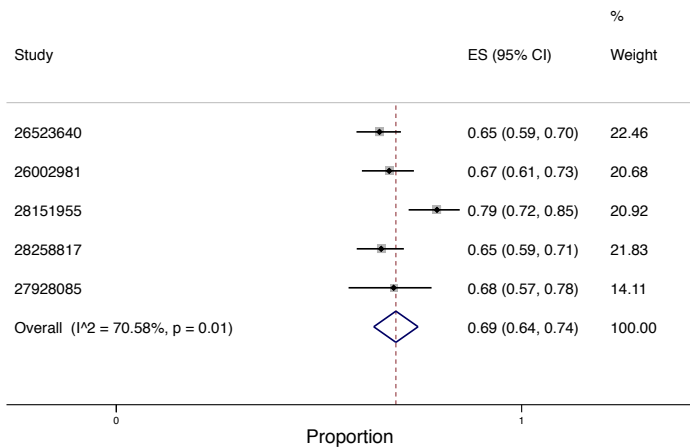

### Difficulty swallowing on admission

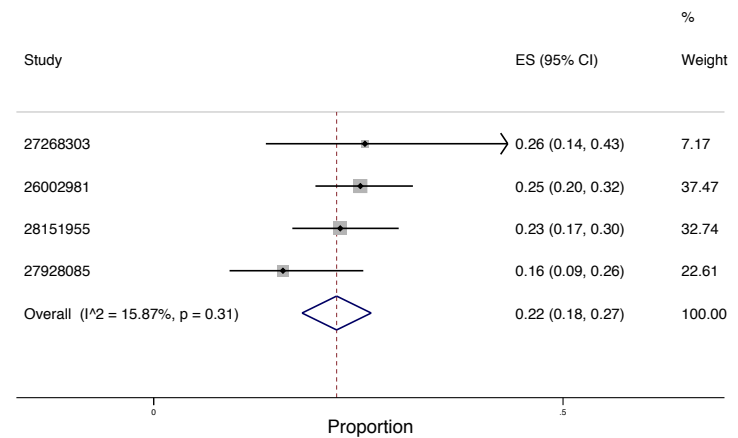

Figure 6: Proportion of EVD patients presenting with a symptom - panel C.

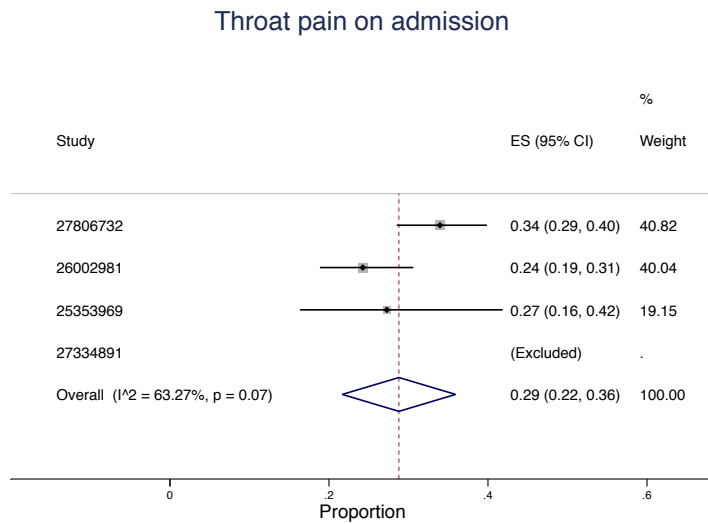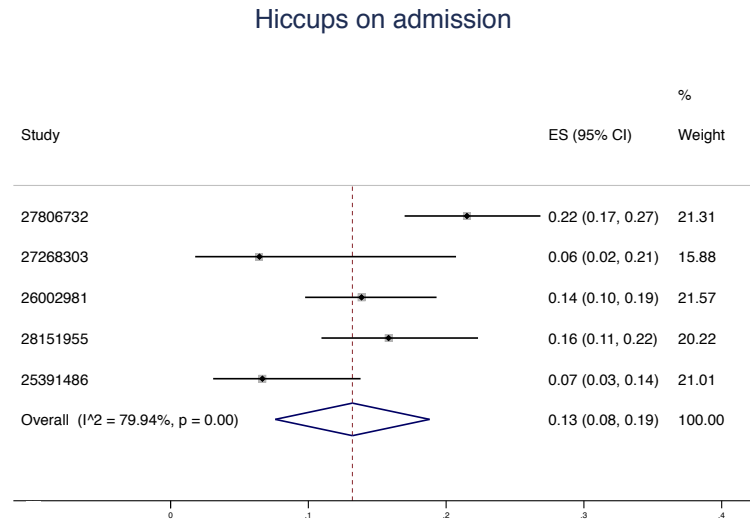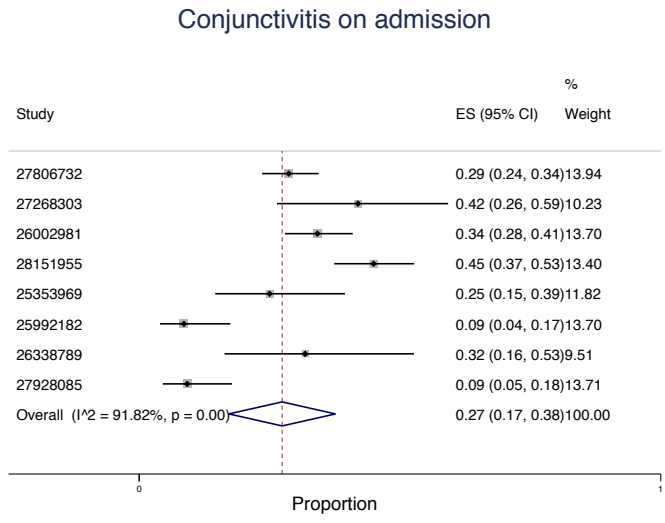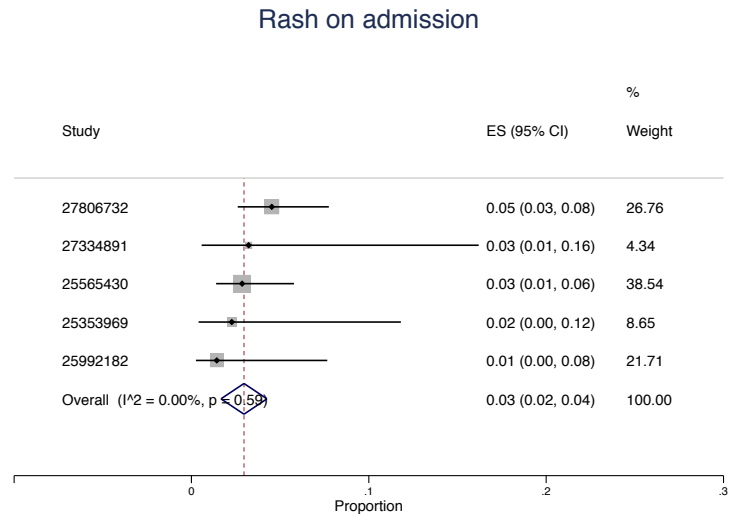

Figure 7: Proportion of EVD patients presenting with a symptom - panel D.

## 5 Appendix 5

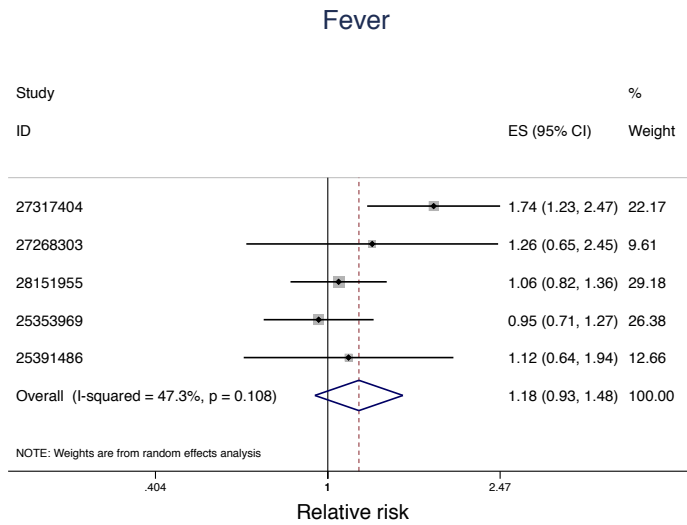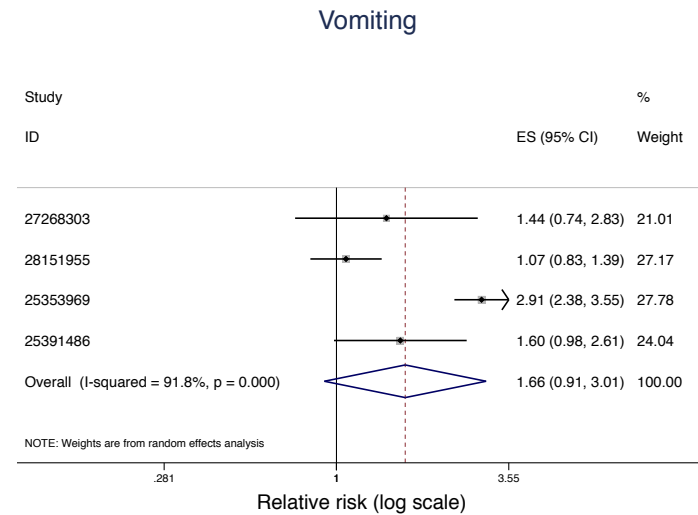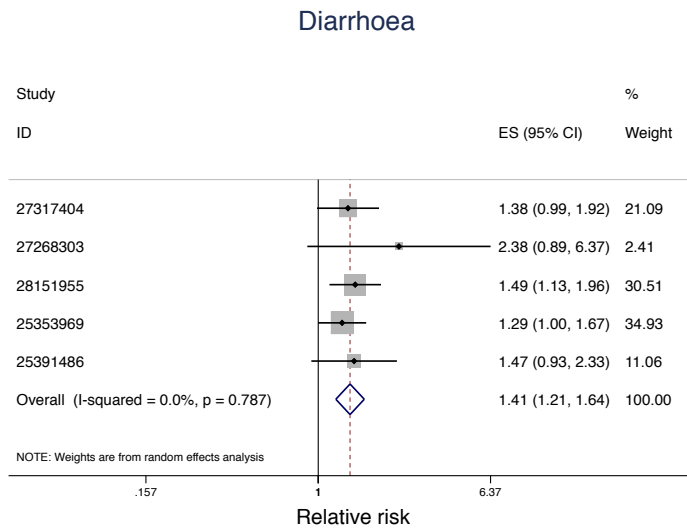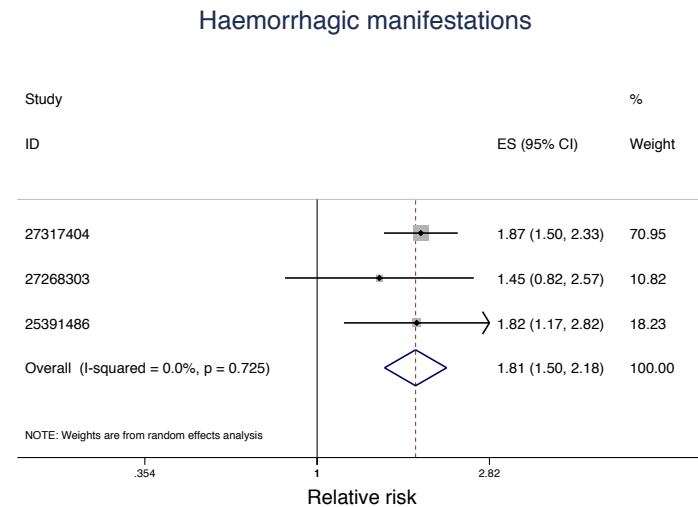

Figure 8: Relative risk of death in EVD patients presenting with a given symptom - panel A

### Myalgia+/- Arthralgia

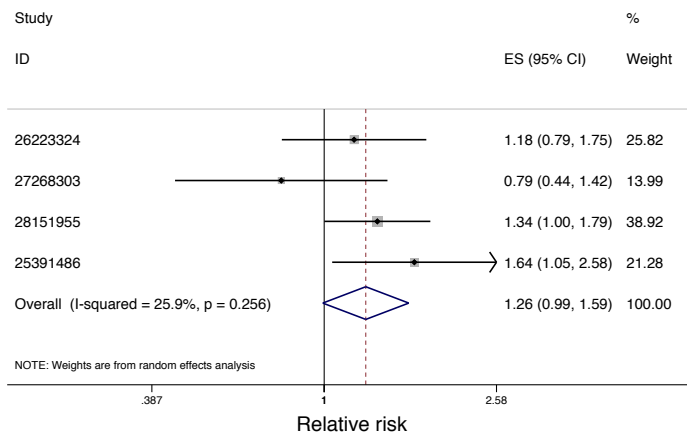

### Headache

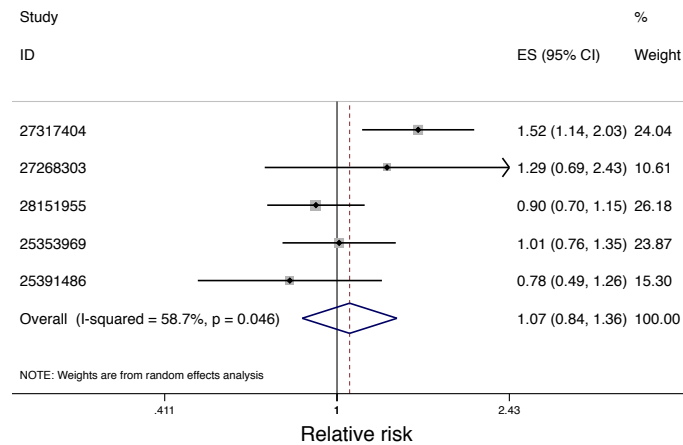

### Anorexia

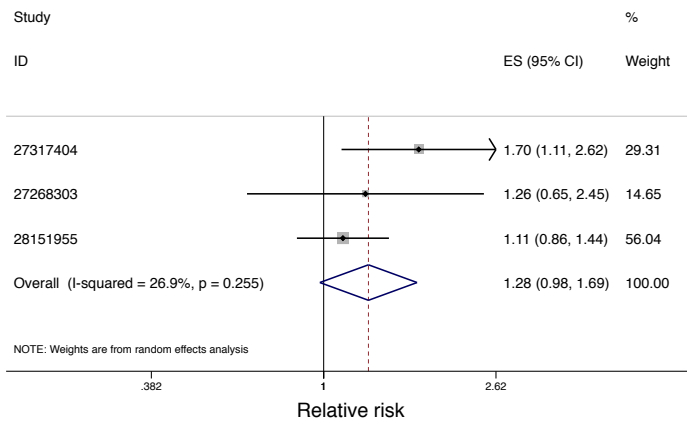

### Breathing difficulties

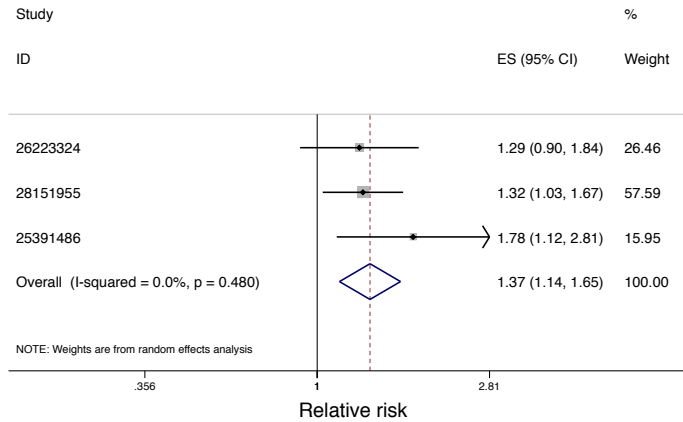

Figure 9: Relative risk of death in EVD patients presenting with a given symptom - panel B

### Difficulty swallowing

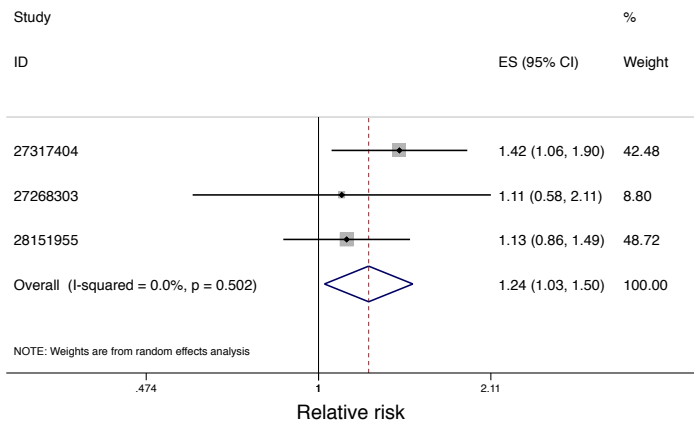

### Hiccups

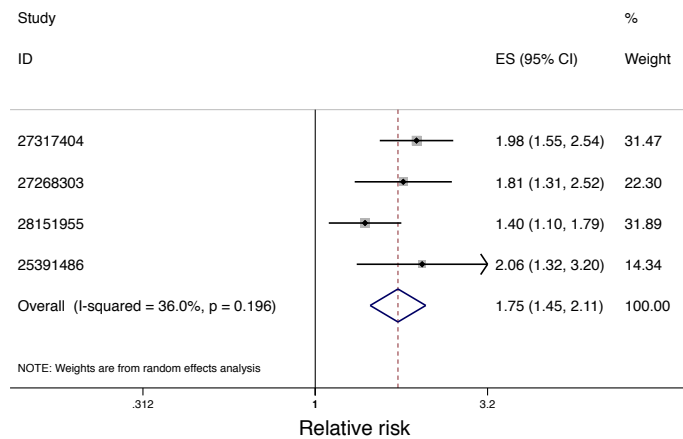

### Conjunctivitis

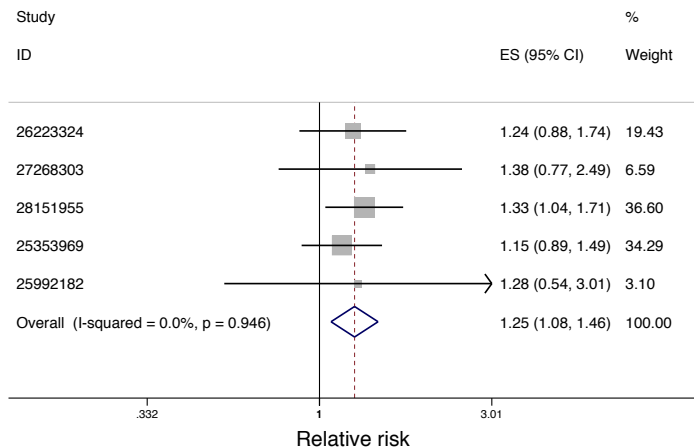

### Confused

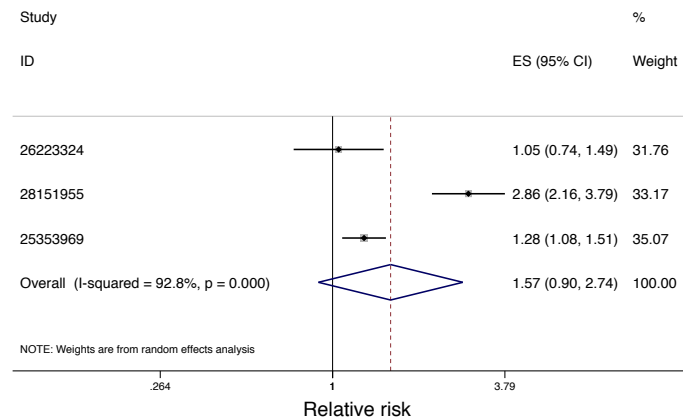

Figure 10: Relative risk of death in EVD patient presenting with a given symptom - panel C.



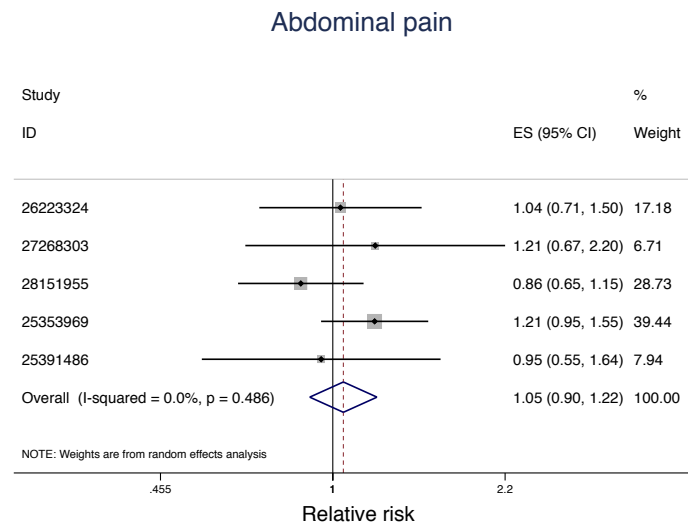

Figure 11: Relative risk of death in EVD patient presenting with a given symptom - panel D. Forest plots are only shown for symptoms with three or more articles reporting data.

## 6 Appendix 6

| Study details |                        |                               | Markers of transparency                                      |                                                                                                                           |
|---------------|------------------------|-------------------------------|--------------------------------------------------------------|---------------------------------------------------------------------------------------------------------------------------|
|               | PubMed ID              | Author                        | Access to individual patient level data<br>NS = no statement | Acknowledges that cohort is otherwise published<br>n/a = only dataset no/c = no, and cites duplicate data without linking |
| Guinea        | 26625118               | Faye <i>et al.</i>            | No (1)                                                       | no                                                                                                                        |
|               | 26134358               | Bordes <i>et al.</i>          | NS                                                           | no                                                                                                                        |
|               | 26338789               | Cournac <i>et al.</i>         | NS                                                           | no                                                                                                                        |
|               | 26541219               | Cotte <i>et al.</i>           | NS                                                           | no                                                                                                                        |
|               | 26582958               | Janvier <i>et al.</i>         | NS                                                           | no                                                                                                                        |
|               | 25391486               | Barry <i>et al.</i>           | NS                                                           | no                                                                                                                        |
|               | 25770172               | Barry <i>et al.</i>           | NS                                                           | no                                                                                                                        |
|               | 25992182               | Qureshi <i>et al.</i>         | NS                                                           | no                                                                                                                        |
|               | 25372658               | Bah <i>et al.</i>             | NS                                                           | no                                                                                                                        |
|               | 27638946               | Kerber <i>et al.</i>          | NS                                                           | n/a                                                                                                                       |
|               | 28352651               | Vernet <i>et al.</i>          | NS                                                           | no                                                                                                                        |
|               | 27928085               | Loubet <i>et al.</i>          | NS                                                           | no                                                                                                                        |
|               | Sierra Leone           | 27806732                      | Ji <i>et al.</i>                                             | NS                                                                                                                        |
| 26523640      |                        | Li <i>et al.</i>              | NS                                                           | yes                                                                                                                       |
| 27317404      |                        | Xi <i>et al.</i>              | NS                                                           | no/c                                                                                                                      |
| 26223324      |                        | Yan <i>et al.</i>             | NS                                                           | no                                                                                                                        |
| 26398207      |                        | Zhang <i>et al.</i>           | No (2)                                                       | no                                                                                                                        |
| 25995207      |                        | Qin <i>et al.</i>             | NS                                                           | no                                                                                                                        |
| 26551684      |                        | Lanini <i>et al.</i>          | NS                                                           | n/a                                                                                                                       |
| 28151955      |                        | Hartley <i>et al.</i>         | No (2)                                                       | n/a                                                                                                                       |
| 28258817      |                        | Waxman <i>et al.</i>          | NS                                                           | no**/c                                                                                                                    |
| 27268303      |                        | Haaskjold <i>et al.</i>       | NS                                                           | no                                                                                                                        |
| 27334891      |                        | Arranz <i>et al.</i>          | Yes (3)                                                      | no                                                                                                                        |
| 26812579      |                        | Crowe <i>et al.</i>           | NS                                                           | no                                                                                                                        |
| 26551677      |                        | de La Vega <i>et al.</i>      | NS                                                           | no                                                                                                                        |
| 26002981      |                        | Fitzpatrick <i>et al.</i>     | NS                                                           | no                                                                                                                        |
| 25565430      |                        | Dallatomasina <i>et al.</i>   | NS                                                           | no                                                                                                                        |
| 28459838      |                        | Theocharopoulos <i>et al.</i> | Yes (4)                                                      | no/c                                                                                                                      |
| 26271406      |                        | Hunt <i>et al.</i>            | NS                                                           | n/a                                                                                                                       |
| 25353969      |                        | Schieffelin <i>et al.</i>     | NS                                                           | n/a                                                                                                                       |
| 25539447      | Ansumana <i>et al.</i> | NS                            | n/a                                                          |                                                                                                                           |
| Liberia       | 25845607               | Levine <i>et al.</i>          | NS                                                           | no**                                                                                                                      |
|               | 26735991               | Gignoux <i>et al.</i>         | NS                                                           | n/a                                                                                                                       |
|               | 27531847               | Rosenke <i>et al.</i>         | NS                                                           | n/a                                                                                                                       |

Figure 12: Indicators of data transparency for included articles. \*\*Cohort is duplicated in another dataset that is not included in this review, as it did not meet eligibility.

## 7 Appendix 7

| PMID     | n    | Mean | SD   | Med | IQR1 | IQR3 | Min  | Max | Cat | Other |
|----------|------|------|------|-----|------|------|------|-----|-----|-------|
| 25353969 | 98   | .    | .    | .   | .    | .    | .    | .   | .   | .     |
| 25372658 | 37   | .    | .    | 38  | 28   | 46   | 19   | 61  | .   | .     |
| 25391486 | 90   | 34.0 | 14   | .   | .    | .    | .    | .   | Y   | .     |
| 25539447 | n/a  | .    | .    | .   | .    | .    | .    | .   | .   | .     |
| 25565430 | 489  | .    | .    | 28  | 17   | 40   | 0.3  | 80  | .   | .     |
| 25770172 | 89   | .    | .    | 32  | 25   | 44   | .    | .   | .   | .     |
| 25845607 | 160  | .    | .    | 33  | .    | .    | .    | .   | .   | (1)   |
| 25992182 | 69   | 34.0 | 14.1 | .   | .    | .    | .    | .   | Y   | .     |
| 25995207 | 61   | 26.4 | 5.81 | 28  | .    | .    | 1.2  | 67  | Y   | .     |
| 26002981 | 525  | .    | .    | 27  | 16   | 40   | .    | .   | .   | .     |
| 26134358 | 22   | 33.0 | 9    | .   | .    | .    | .    | .   | .   | .     |
| 26223324 | 108  | 27.4 | 13.6 | .   | .    | .    | .    | .   | Y   | .     |
| 26271406 | 118  | 25.9 | 14.7 | .   | .    | .    | .    | .   | Y   | .     |
| 26338789 | 22   | 32.9 | 9.2  | .   | .    | .    | .    | .   | .   | .     |
| 26398207 | 63   | .    | .    | .   | .    | .    | .    | .   | Y   | .     |
| 26523640 | 288  | .    | .    | 28  | 17   | 38   | .    | .   | Y   | .     |
| 26541219 | 14   | .    | .    | 31  | 27   | 33   | .    | .   | .   | .     |
| 26551677 | 632  | 26.9 | .    | 25  | .    | .    | 0.3  | 75  | Y   | .     |
| 26551684 | 84   | .    | .    | .   | .    | .    | .    | .   | Y   | .     |
| 26582958 | 14   | 30.0 | 7    | .   | .    | .    | .    | .   | .   | .     |
| 26625118 | 699  | 31.0 | .    | .   | 20   | 42   | .    | .   | .   | .     |
| 26735991 | n/a  | .    | .    | .   | .    | .    | .    | .   | Y   | .     |
| 26812579 | 151  | .    | .    | .   | .    | .    | .    | .   | .   | (2)   |
| 27268303 | 31   | .    | .    | 30  | .    | .    | 0.25 | 85  | .   | .     |
| 27317404 | 139  | 30.1 | 17.1 | 29  | .    | .    | 0.5  | 75  | .   | .     |
| 27334891 | 31   | .    | .    | 30  | 17   | 40   | .    | .   | .   | .     |
| 27531847 | 1110 | 29.8 | 15.6 | .   | .    | .    | 0.01 | 83  | Y   | .     |
| 27638946 | 1225 | .    | .    | 30  | 19   | 45   | .    | .   | .   | .     |
| 27806732 | 285  | 29.2 | 16.4 | 28  | 19   | 38   | 0.08 | 80  | Y   | .     |
| 27928085 | 76   | .    | .    | 28  | 18   | 48   | .    | .   | Y   | .     |
| 28151955 | 158  | .    | .    | .   | .    | .    | .    | .   | .   | .     |
| 28258817 | 254  | .    | .    | .   | .    | .    | .    | .   | .   | (2)   |
| 28352651 | 97   | 30.1 | .    | .   | .    | .    | 1    | 68  | Y   | .     |
| 28459838 | 248  | .    | .    | 28  | 17   | 38   | .    | .   | Y   | .     |

Figure 13: Mapping of reporting of patient age in included articles. N is the number of patients with age recorded; SD is standard deviation; Med is median; IQR1 is the first interquartile range; IQR3 is the third interquartile range; (1) reports the 95% confidence interval as the distribution; (2) reports ages of sub-groups only.

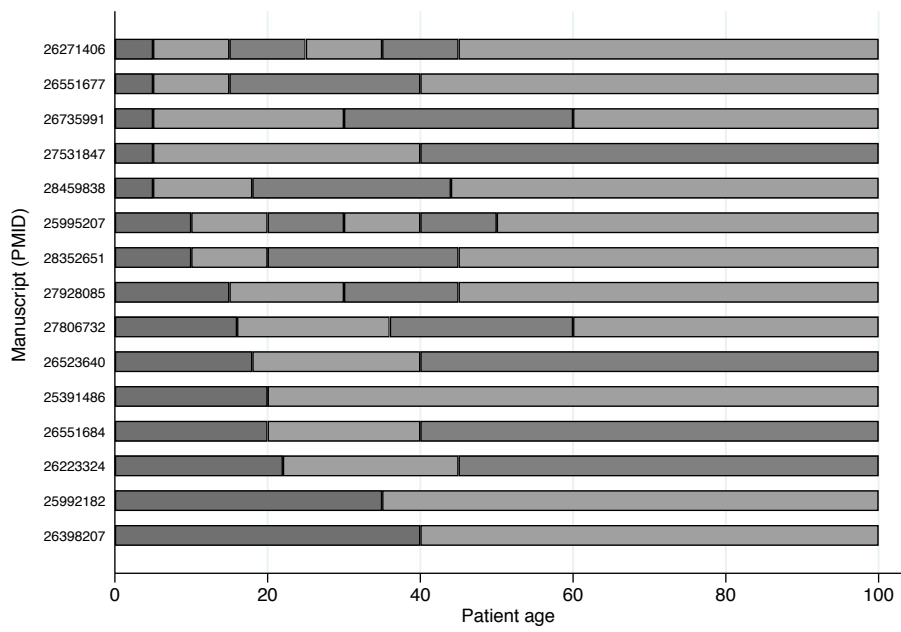

Figure 14: Age categories selected for stratification in included articles

| Article  | Patients who survived |      |       |      |      |      |     |         |       | Patients who died |       |        |      |      |       |     |         |       | All patients |      |      |      |      |      |      |               |                                                                             | Other                                                                       |  |
|----------|-----------------------|------|-------|------|------|------|-----|---------|-------|-------------------|-------|--------|------|------|-------|-----|---------|-------|--------------|------|------|------|------|------|------|---------------|-----------------------------------------------------------------------------|-----------------------------------------------------------------------------|--|
|          | n                     | mean | SD    | Med  | IQR1 | IQR3 | Min | Max     | 95%CI | n                 | mean  | SD     | Med  | IQR1 | IQR3  | Min | Max     | 95%CI | n            | mean | SD   | Med  | IQR1 | IQR3 | Min  | Max           | Unit                                                                        | Categorisation of viral load                                                |  |
| !7806732 | .                     | .    | .     | .    | .    | .    | .   | .       | .     | .                 | .     | .      | .    | .    | .     | .   | .       | .     | .            | .    | .    | .    | .    | .    | .    | .             | log copies/ml                                                               | VL = <10 <sup>6</sup> , >10 <sup>6</sup>                                    |  |
| !6523640 | .                     | .    | .     | .    | .    | .    | .   | .       | .     | .                 | .     | .      | .    | .    | .     | .   | .       | .     | .            | 288  | 6.68 | 5.3  | 7.75 | .    | .    | .             | log copies/ml                                                               | VL = <10 <sup>6</sup> , >10 <sup>6</sup>                                    |  |
| !7317404 | 63                    | .    | .     | .    | .    | .    | .   | .       | .     | 76                | .     | .      | .    | .    | .     | .   | .       | .     | 139          | .    | .    | .    | .    | .    | .    | copies/ml     | VL = <10 <sup>5</sup> , 10 <sup>5</sup> -10 <sup>7</sup> , >10 <sup>7</sup> |                                                                             |  |
| !6223324 | 34                    | 25.2 | 4.1   | .    | .    | .    | .   | .       | .     | 51                | 28.7  | 5.7    | .    | .    | .     | .   | .       | .     | 85           | 26.3 | 4.4  | .    | .    | .    | .    | Ct            | .                                                                           |                                                                             |  |
| !6398207 | .                     | .    | .     | .    | .    | .    | .   | .       | .     | .                 | .     | .      | .    | .    | .     | .   | .       | .     | .            | .    | .    | .    | .    | .    | .    | .             | .                                                                           | VL = <10 <sup>6</sup> , >10 <sup>6</sup>                                    |  |
| !5995207 | .                     | .    | .     | .    | .    | .    | .   | .       | .     | .                 | .     | .      | .    | .    | .     | .   | .       | .     | .            | .    | .    | .    | .    | .    | .    | .             | .                                                                           | .                                                                           |  |
| !7268303 | 13                    | .    | .     | 26.5 | .    | .    | 22  | 36.5    | .     | 17                | .     | .      | 20.5 | .    | 15    | 23  | .       | .     | 30           | .    | .    | 22   | .    | 15   | 36.5 | Ct            | .                                                                           |                                                                             |  |
| !7334891 | .                     | .    | .     | .    | .    | .    | .   | .       | .     | .                 | .     | .      | .    | .    | .     | .   | .       | .     | .            | .    | .    | .    | .    | .    | .    | .             | .                                                                           | .                                                                           |  |
| !6551677 | 379                   | 6.18 | .     | .    | .    | .    | .   | 6.0-6.3 | .     | 253               | 4.02  | .      | .    | .    | .     | .   | 3.9-4.2 | .     | 632          | .    | .    | .    | .    | .    | .    | .             | log GEO/mL                                                                  | Ct = <20, 20-30, >30                                                        |  |
| !6002981 | 255                   | .    | .     | 31   | 25   | 34   | .   | .       | .     | 270               | .     | .      | 22   | 20   | 25    | .   | .       | .     | 346          | .    | .    | .    | .    | .    | .    | .             | Ct                                                                          | Ct = <25, ≥25                                                               |  |
| !5565430 | .                     | .    | .     | .    | .    | .    | .   | .       | .     | .                 | .     | .      | .    | .    | .     | .   | .       | .     | .            | .    | .    | .    | .    | .    | .    | .             | .                                                                           | .                                                                           |  |
| !8459838 | .                     | .    | .     | .    | .    | .    | .   | .       | .     | 110               | .     | .      | .    | .    | .     | .   | .       | .     | .            | 249  | .    | 26   | 20   | 32   | 14   | 38            | Ct                                                                          | Ct = <22, ≥22                                                               |  |
| !6812579 | 72                    | 27.9 | .     | .    | .    | .    | .   | .       | .     | 72                | 20.5  | .      | .    | .    | .     | .   | .       | .     | .            | .    | .    | .    | .    | .    | .    | .             | Ct                                                                          | Ct = <24, ≥24                                                               |  |
| !6551684 | 38                    | 7.11 | .     | .    | .    | .    | .   | .       | .     | 46                | 8.36  | .      | .    | .    | .     | .   | .       | .     | .            | .    | .    | .    | .    | .    | .    | log copies/ml | .                                                                           |                                                                             |  |
| !8151955 | 62                    | 24.9 | .     | .    | .    | .    | .   | .       | .     | 96                | 20.6  | .      | .    | .    | .     | .   | .       | .     | .            | 144  | 22   | .    | .    | 13.5 | 37.9 | Ct            | Ct = <20, ≥20                                                               |                                                                             |  |
| !5539447 | .                     | .    | .     | .    | .    | .    | .   | .       | .     | .                 | .     | .      | .    | .    | .     | .   | .       | .     | .            | .    | .    | .    | .    | .    | .    | .             | .                                                                           | .                                                                           |  |
| !5353969 | .                     | .    | .     | .    | .    | .    | .   | .       | .     | 45                | .     | .      | .    | .    | .     | .   | .       | .     | .            | .    | .    | .    | .    | .    | .    | .             | copies/ml                                                                   | VL = <10 <sup>5</sup> , 10 <sup>5</sup> -10 <sup>7</sup> , >10 <sup>7</sup> |  |
| !6271406 | 73                    | 23.4 | 4.3   | .    | .    | .    | .   | .       | .     | 39                | 18.3  | 2.7    | .    | .    | .     | .   | .       | .     | .            | 112  | 21.4 | 4.5  | .    | .    | .    | .             | Ct                                                                          | Ct = <20, ≥20                                                               |  |
| !8258817 | .                     | .    | .     | .    | .    | .    | .   | .       | .     | .                 | .     | .      | .    | .    | .     | .   | .       | .     | .            | .    | .    | .    | .    | .    | .    | .             | .                                                                           | .                                                                           |  |
| !5845607 | .                     | .    | .     | .    | .    | .    | .   | .       | .     | .                 | .     | .      | .    | .    | .     | .   | .       | .     | .            | .    | .    | .    | .    | .    | .    | .             | .                                                                           | .                                                                           |  |
| !6735991 | .                     | .    | .     | .    | .    | .    | .   | .       | .     | .                 | .     | .      | .    | .    | .     | .   | .       | .     | .            | 381  | .    | 19.4 | 17.1 | 22.8 | .    | .             | Ct                                                                          | .                                                                           |  |
| !7531847 | 570                   | 28.4 | 4.3   | .    | .    | .    | .   | .       | .     | 612               | 25.9  | 3.8    | .    | .    | .     | .   | .       | .     | .            | 1182 | 27   | 4.7  | .    | .    | .    | .             | Ct                                                                          | Ct = <25, 25 - <30, 30 to <37                                               |  |
| !6625118 | .                     | .    | .     | .    | .    | .    | .   | .       | .     | .                 | .     | .      | .    | .    | .     | .   | .       | .     | .            | 548  | .    | .    | .    | .    | .    | .             | log copies/ml                                                               | log VL = <104.4, 104.4-105.2, ≥ 105.2                                       |  |
| !5391486 | .                     | .    | .     | .    | .    | .    | .   | .       | .     | .                 | .     | .      | .    | .    | .     | .   | .       | .     | .            | .    | .    | .    | .    | .    | .    | .             | .                                                                           | .                                                                           |  |
| !5770172 | .                     | .    | .     | .    | .    | .    | .   | .       | .     | .                 | .     | .      | .    | .    | .     | .   | .       | .     | .            | .    | .    | .    | .    | .    | .    | .             | .                                                                           | .                                                                           |  |
| !5992182 | .                     | .    | .     | .    | .    | .    | .   | .       | .     | .                 | .     | .      | .    | .    | .     | .   | .       | .     | .            | .    | .    | .    | .    | .    | .    | .             | .                                                                           | .                                                                           |  |
| !6541219 | .                     | .    | .     | .    | .    | .    | .   | .       | .     | .                 | .     | .      | .    | .    | .     | .   | .       | .     | .            | .    | .    | .    | .    | .    | .    | .             | .                                                                           | .                                                                           |  |
| !6582958 | .                     | .    | .     | .    | .    | .    | .   | .       | .     | 5                 | .     | .      | 19.5 | .    | .     | .   | .       | .     | .            | 14   | .    | .    | .    | .    | .    | .             | Ct                                                                          | Ct = <20, 20-30, >30                                                        |  |
| !6134358 | 16                    | 23   | 3.1   | .    | .    | .    | .   | .       | .     | 6                 | 17.7  | 3.8    | .    | .    | .     | .   | .       | .     | .            | 22   | 21.6 | 3.9  | .    | .    | .    | .             | Ct                                                                          | .                                                                           |  |
| !6338789 | 16                    | 23   | 3.1   | .    | .    | .    | .   | .       | .     | 6                 | 17.7  | 3.8    | .    | .    | .     | .   | .       | .     | .            | .    | .    | .    | .    | .    | .    | .             | Ct                                                                          | .                                                                           |  |
| !5372658 | 21                    | 8207 | 17189 | 1079 | 148  | 5059 | .   | .       | .     | 16                | 68361 | 111340 | 1915 | 141  | 12998 | .   | .       | .     | .            | .    | .    | .    | .    | .    | .    | copies/ml     | VL <100,000, >100,000                                                       |                                                                             |  |
| !7638946 | 479                   | .    | .     | 23.2 | 20.4 | 26.5 | .   | .       | .     | 719               | .     | .      | 18.1 | 16.2 | 20.8  | .   | .       | .     | .            | .    | .    | .    | .    | .    | .    | .             | Ct                                                                          | .                                                                           |  |
| !7928085 | .                     | .    | .     | .    | .    | .    | .   | .       | .     | .                 | .     | .      | .    | .    | .     | .   | .       | .     | .            | .    | .    | .    | .    | .    | .    | .             | .                                                                           | .                                                                           |  |
| !8352651 | .                     | .    | .     | .    | .    | .    | .   | .       | .     | .                 | .     | .      | .    | .    | .     | .   | .       | .     | .            | .    | .    | .    | .    | .    | .    | .             | FFU/mL                                                                      | .                                                                           |  |

Figure 15: Mapping of reporting of viral load in included articles. N is the number of patients with age recorded; SD is standard deviation; Med is median; IQR1 is the first interquartile range; IQR3 is the third interquartile range; 95%CI is the 95% confidence interval.

## 8 Appendix 8



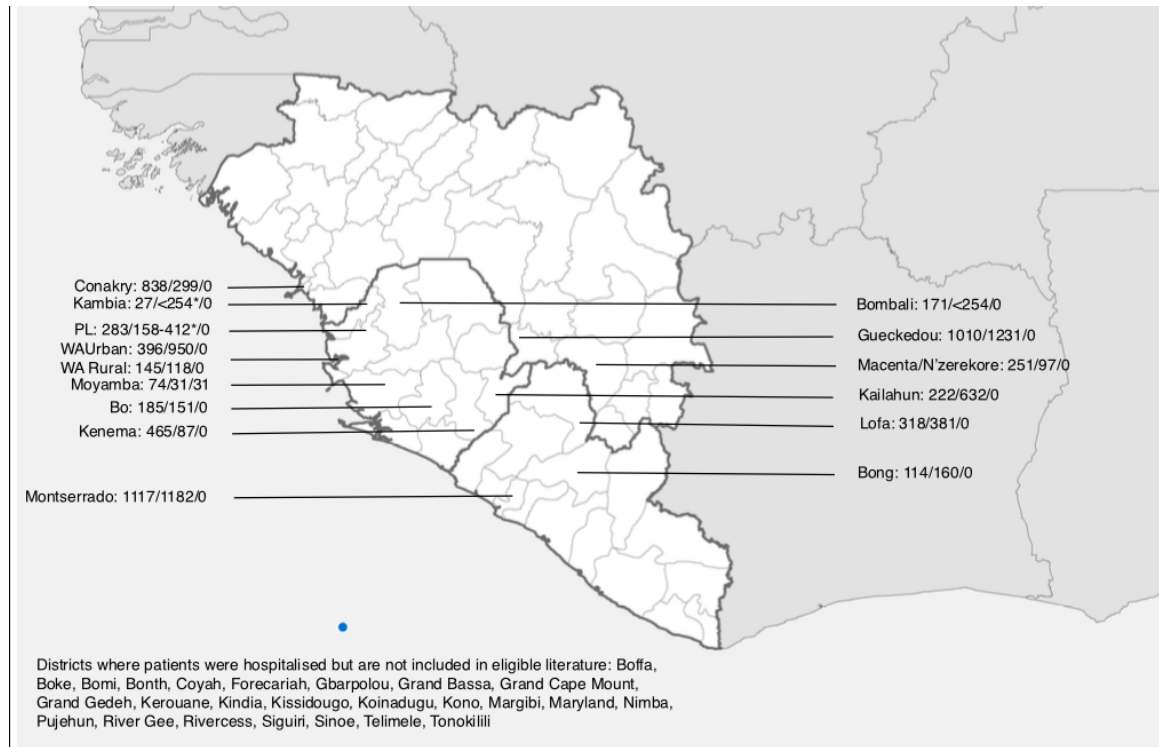

Figure 16: Map of most affected countries showing geographical distribution of included ETCs. The numbers represent *the number of hospitalised cases with known outcome from WHO data / the number of hospitalised cases in the included articles / the number of hospitalised cases with individual level patient data accessible* for each region. Map boundaries shown are administrative 2 boundaries for Sierra Leone and administrative 1 boundaries for Liberia and Guinea, consistent with WHO regional reporting during the outbreak. \*Data were across two administrative regions.
